# Supplementary material for: Application of CPBL combined with mind mapping in acute abdomen clinical training to improve post-training competence
Source: Frontiers journal article supplement (doi:10.3389/fmed.2025.1565531), 2025-11-14
Supplement: Table_1.docx [file Table_1.docx]

Table 1 Comparison of the members of the two groups in general information

| group | number of cases | gender | age | education | entry grades |
| --- | --- | --- | --- | --- | --- |
| male female | （year, ±*s*） | bachelor college | （score, ±*s*） |
| observation group | 144 | 79 65 | 22.34±2.45 | 123 21 | 78.73±5.78 |
| control group | 72 | 41 31 | 22.67±2.73 | 62 10 | 80.24±7.16 |
| 2/*t* |  | 1.625 | 0.706 | 0.510 | 1.374 |
| *P* |  | 0.131 | 0.592 | 0.714 | 0.168 |
