# Supplementary material for: Application of CPBL combined with mind mapping in acute abdomen clinical training to improve post-training competence
Source: Frontiers journal article supplement (doi:10.3389/fmed.2025.1565531), 2025-11-14
Supplement: Table_2.docx [file Table_2.docx]

Table 2 Comparison of the members of the two groups in teaching adherence [n (%)]

| group | number of cases | full compliance | basic compliance | partial compliance | non-compliance | adherence |
| --- | --- | --- | --- | --- | --- | --- |
| observation group | 144 | 86 | 35 | 17 | 6 | 121（84.0%） |
| control group | 72 | 44 | 19 | 6 | 3 | 63（87.5%） |
| 2 |  |  |  |  |  | 0.862 |
| *P* |  |  |  |  |  | 0.478 |
