# Supplementary material for: Application of CPBL combined with mind mapping in acute abdomen clinical training to improve post-training competence
Source: Frontiers journal article supplement (doi:10.3389/fmed.2025.1565531), 2025-11-14
Supplement: Table_3.docx [file Table_3.docx]

Table 3 Comparison of the members of the two groups in teaching satisfaction

| group | number of cases | recognizing teaching mode | stimulating learning interest | enhancing teamwork | improving clinical thinking | deepening knowledge understanding | overall satisfaction | overall scores |
| --- | --- | --- | --- | --- | --- | --- | --- | --- |
| observation group | 144 | 9.23±1.42 | 8.91±1.03 | 8.72±0.96 | 9.05±1.66 | 8.56±0.90 | 9.30±1.45 | 53.87±7.42 |
| control group | 72 | 8.35±1.19 | 7.50±0.85 | 6.54±1.02 | 7.87±1.23 | 7.61±1.26 | 7.38±1.18 | 45.23±6.75 |
| *t* |  | 2.826 | 4.087 | 5.529 | 3.614 | 3.242 | 5.160 | 4.728 |
| *P* |  | 0.024 | 0.003 | < 0.001 | 0.007 | 0.015 | < 0.001 | < 0.001 |
